# Supplementary material
Source: Springer Nature journal article supplement (https://www.springermedizin.de/resource/supplementary/12913_2010_1611_MOESM4_ESM.pdf/9529404)

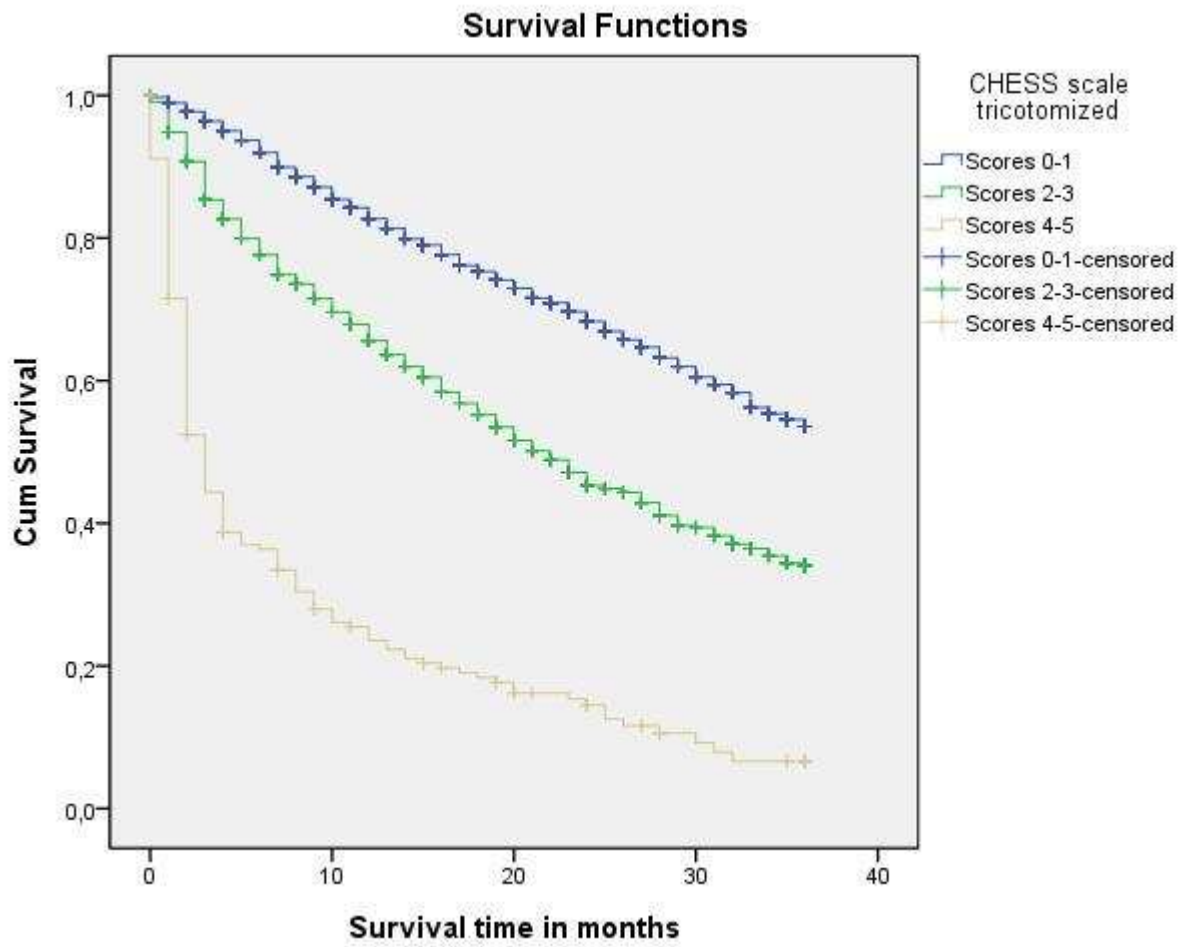

\*Log Rank test  $p < 0.001$

Supplement: MOESM4 [file 9529404]
